# Supplementary material for: Chronic Dietary Intake of Enniatin B in Broiler Chickens Has Low Impact on Intestinal Morphometry and Hepatic Histology, and Shows Limited Transfer to Liver Tissue
Source: Toxins (Basel). 2018 Jan 18;10(1):45. doi: 10.3390/toxins10010045 (PMC5793132; doi:10.3390/toxins10010045)
Supplement: Supplementary file 1 [file toxins-10-00045-s001.pdf]

# Supplementary Materials: Chronic Dietary Intake of Enniatin B in Broiler Chickens Has Low Impact on Intestinal Morphometry and Hepatic Histology, and Shows Limited Transfer to Liver Tissue

Sophie Fraeyman, Siska Croubels, Mathias Devreese, Richard Ducatelle, Michael Rychlik and Gunther Antonissen

**Table S1.** Results of the Within- and Between-run Precision and Accuracy Evaluation for the Analysis of ENN B in Broiler Chicken Liver.

| Theoretical concentration<br>(ng/g) | Mean concentration $\pm$ SD<br>(ng/g) | Precision,<br>RSD (%) | Accuracy (%) |
|-------------------------------------|---------------------------------------|-----------------------|--------------|
| 0.05 <sup>a</sup>                   | 0.04 $\pm$ 0.005                      | 11.9                  | -13.3        |
| 0.05 <sup>b</sup>                   | 0.04 $\pm$ 0.010                      | 23.8                  | -13.3        |
| 0.50 <sup>a</sup>                   | 0.49 $\pm$ 0.005                      | 1.1                   | -3.0         |
| 0.50 <sup>b</sup>                   | 0.52 $\pm$ 0.027                      | 5.2                   | 3.7          |
| 5.00 <sup>a</sup>                   | 4.75 $\pm$ 0.054                      | 1.1                   | -5.1         |
| 5.00 <sup>b</sup>                   | 4.99 $\pm$ 0.243                      | 4.9                   | -0.3         |

<sup>a</sup> Within-run; <sup>b</sup> between-run; SD: standard deviation; RSD: relative standard deviation. Acceptance criteria for accuracy were: -50% to +20% and -30% to +10% for concentration levels  $\leq$  1 ng/g and between 1 and 10 ng/g, respectively. The precision was evaluated by the determination of the relative standard deviation (RSD), which had to be below the RSD<sub>max</sub> value. For the within-day precision, RSD<sub>max</sub> is fixed at 30% and 25% for concentrations  $\leq$  1 ng/g and between 1 and 10 ng/g, respectively [23]. For between-run precision, the RSD had to be below the RSD<sub>max</sub> value calculated by the Horwitz equation [23]. These criteria were 71.0%, 50.2% and 35.5% for concentrations at 0.05 ng/g, 0.5 ng/g and 5 ng/g, respectively.

**Table S2.** Decision Limit (CC $\alpha$ ) of the Mycotoxins analyzed in the Experimental Diets [18].

| Mycotoxin                | CC $\alpha$ ( $\mu$ g/kg)                                 |
|--------------------------|-----------------------------------------------------------|
| aflatoxin B1             | 6.75 <sup>a</sup> -11.75 <sup>b</sup> -21.75 <sup>c</sup> |
| aflatoxin B2             | 1.53                                                      |
| aflatoxin G1             | 1.93                                                      |
| aflatoxin G2             | 2.39                                                      |
| altenuene                | 4.54                                                      |
| alternariol              | 11.98                                                     |
| alternariol methylether  | 17.75                                                     |
| deoxynivalenol           | 60.61                                                     |
| 3-acetyl-deoxynivalenol  | 4.90                                                      |
| 15-acetyl-deoxynivalenol | 3.07                                                      |
| diacetoxyscirpenol       | 0.67                                                      |
| enniatin B <sup>d</sup>  | 80.0                                                      |
| fumonisin B1             | 31.84                                                     |
| fumonisin B2             | 24.37                                                     |
| fumonisin B3             | 23.18                                                     |
| fusarenon-X              | 16.58                                                     |
| neosolaniol              | 8.60                                                      |
| nivalenol                | 36.22                                                     |
| ochratoxin A             | 3.44                                                      |

|                  |       |
|------------------|-------|
| rocquefortin-C   | 1.08  |
| sterigmatocystin | 4.75  |
| T2 toxin         | 9.38  |
| HT-2 toxin       | 9.23  |
| zearalenone      | 17.85 |

<sup>a</sup> for a maximum level in feed of 5 µg aflatoxin B1/kg, <sup>b</sup> for a maximum level in feed of 10 µg aflatoxin B1/kg, <sup>c</sup> for a maximum level in feed of 20 µg aflatoxin B1/kg, <sup>d</sup> cut-off of 80.0 µg/kg for ENN B

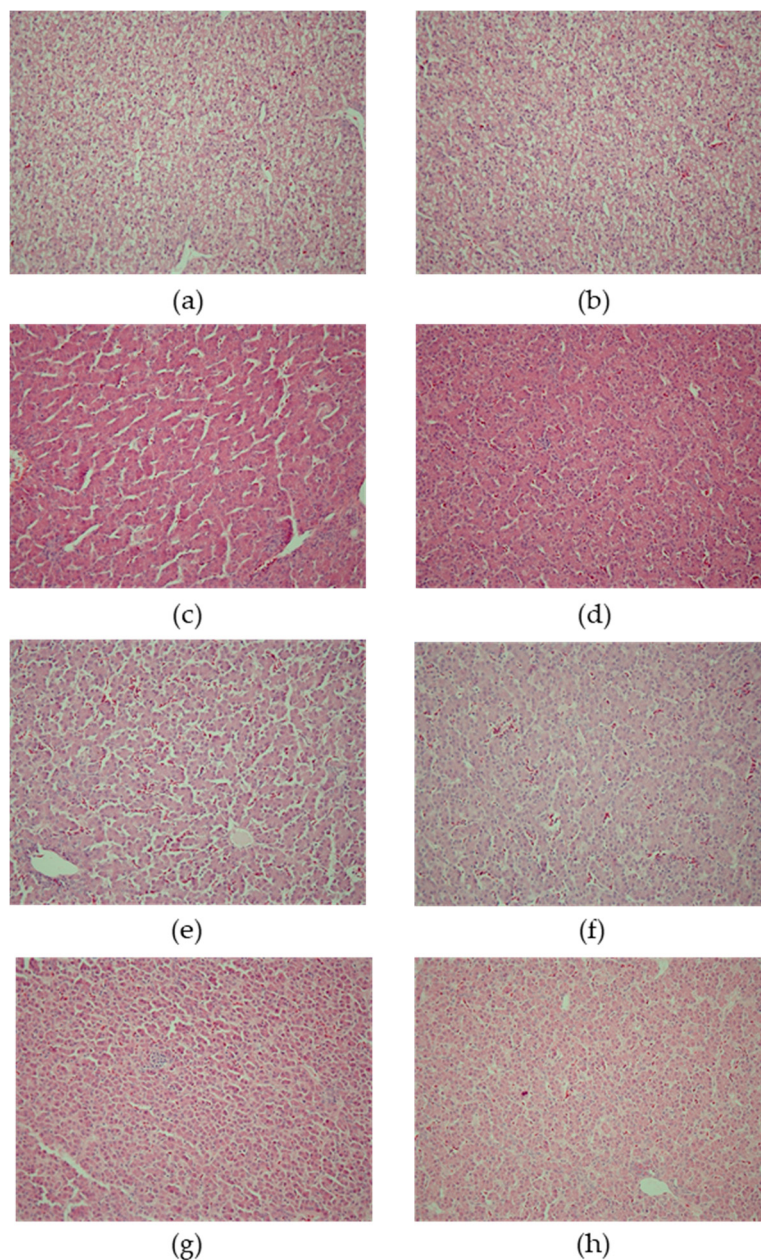

**Figure S1.** Histology of the liver of broiler chickens (20×). (a) ENN B diet, 2 days old; (b) control diet, 2 days old; (c) ENN B diet, 7 days old; (d) control diet, 7 days old; (e) ENN B diet, 14 days old; (f) control diet, 14 days old; (g) ENN B diet, 21 days old; (h) control diet, 21 days old.
